# Supplementary material
Source: Springer Nature journal article supplement (https://www.springermedizin.de/resource/supplementary/13014_2013_903_MOESM2_ESM.pdf/9634344)
Supplement: MOESM2 [file 9634344]

| OAR / LEVEL          | TIME (min)   |              |
|----------------------|--------------|--------------|
|                      | MAN          | CORR         |
| BRAINSTEM            | 2,90         | 1,20         |
| SPINAL CORD          | 3,90         | 0,00         |
| PAROTIDS             | 4,40         | 3,30         |
| <i>Subtotal OARs</i> | <i>11,20</i> | <i>4,50</i>  |
| 1A                   | 1,10         | 1,00         |
| 1B                   | 3,90         | 3,70         |
| 2                    | 5,30         | 2,40         |
| 3                    | 3,70         | 2,30         |
| 4                    | 2,80         | 3,00         |
| 5                    | 2,90         | 1,60         |
| 6                    | 6,60         | 3,10         |
| RP                   | 2,50         | 1,70         |
| RST                  | 1,20         | 1,50         |
| RCL                  | 3,70         | 3,70         |
| <i>Subtotal CTV</i>  | <i>33,70</i> | <i>24,00</i> |
| <i>TOTAL</i>         | <i>44,90</i> | <i>28,50</i> |
